# Supplementary material for: Paeoniflorin Alleviates Cisplatin-Induced Diminished Ovarian Reserve by Restoring the Function of Ovarian Granulosa Cells via Activating FSHR/cAMP/PKA/CREB Signaling Pathway
Source: MDPI journal article supplement (doi:10.3390/molecules28248123), 2023-12-15
Supplement: s1 [file s1]

### Supplement Materials

40 mice with normal estrous cycle were screened to randomly assign into five groups (n = 8): Control (Con), Model (DOR), Low-dose paeoniflorin (L-PAE), High-dose paeoniflorin (H-PAE) and hormone replacement therapy (HRT). Renal index = renal weight (mg)/body weight (g).

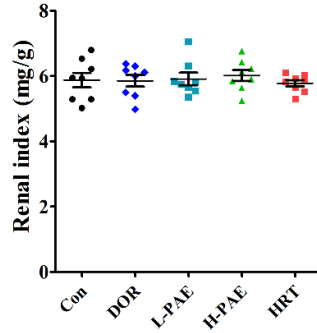

**Figure S1.** PAE intervention hardly exhibited negative effects on renal index in DOR mice (n = 8).

FSHR siRNA or control siRNA was transfected into KGN cells. siRNA-1 (Forward: GAGCUGAAUCUAAGCGAUATT; Reverse: UAUCGCUUAGAUUCAGCUCTT), siRNA-2 (Forward: CAGUUGAUAUCCAUAACCAATT; Reverse: UUGGUAUGGAUAUCAACUGTT), siRNA-3 (Forward: GGCAAUCUCUGAGCUUCATT; Reverse: UGAAGCUCAGAGAUU UGCCTT) were synthesized by Beijing Qingke Biotech Biological Co., Ltd (Beijing, China). KGN cells ( $2 \times 10^5$  cells/well) were plated at 6-well plates for 24 h, and then were treated with siRNA-FSHR and the corresponding negative control siRNA with Lipofectamine™ 2000 (Thermo Fisher) in serum-free medium for 6 h.

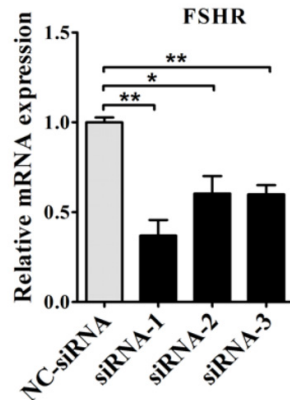

**Figure S2.** Effect of FSHR siRNA transfection on gene expression of FSHR in KGN cells. \*  $p < 0.05$ , \*\*  $p < 0.01$  vs. NC-siRNA group.
